# Supplementary material for: Daily Fluctuation of Facial Pore Area, Roughness and Redness among Young Japanese Women; Beneficial Effects of Galactomyces Ferment Filtrate Containing Antioxidative Skin Care Formula
Source: MDPI journal article supplement (doi:10.3390/jcm10112502), 2021-06-05
Supplement: s1 [file s1]

## Supplementary Figure S1

Baseline period  
at week -4

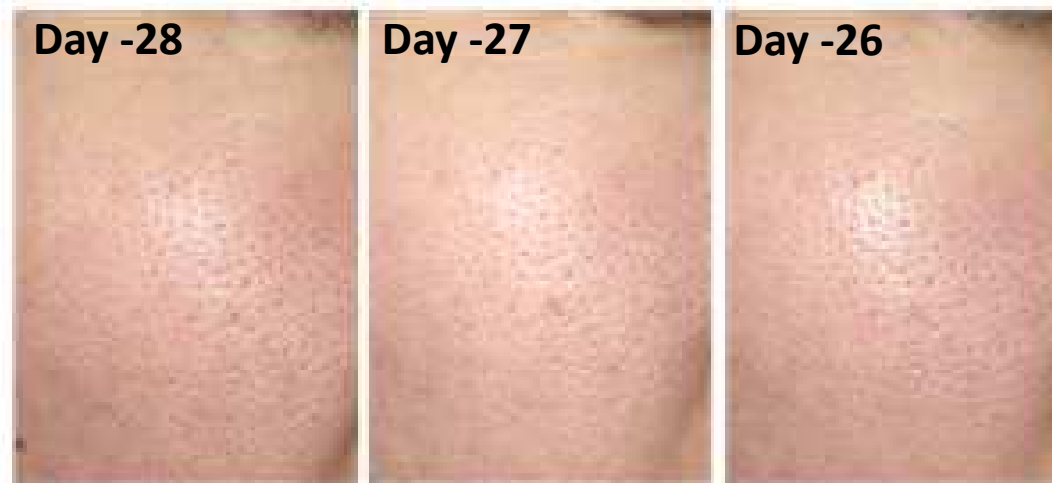

GFF treatment  
at week 4

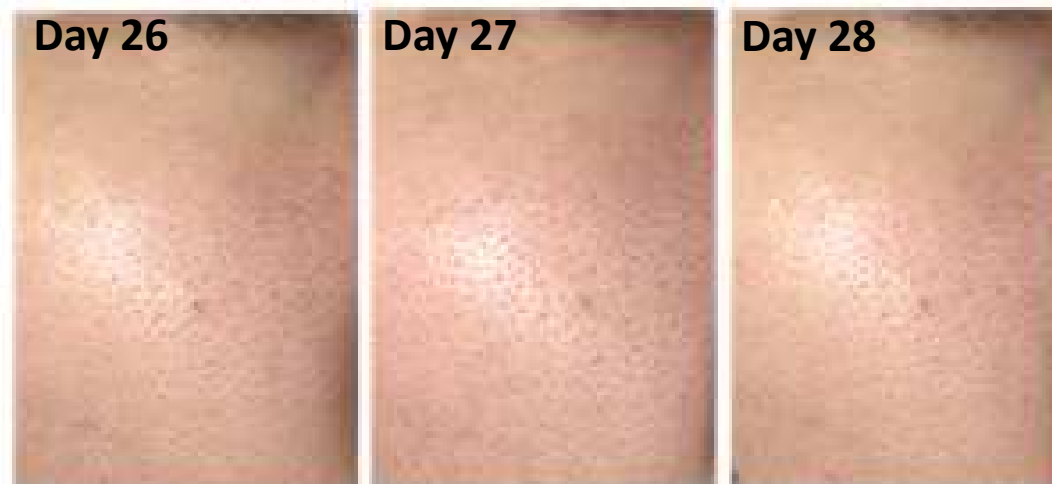

Clinical photos for visible pores.  
Visible pores in baseline period at week -4 and in GFF treatment at week 4 are shown.

## Supplementary Figure S2

Baseline period  
at week -4

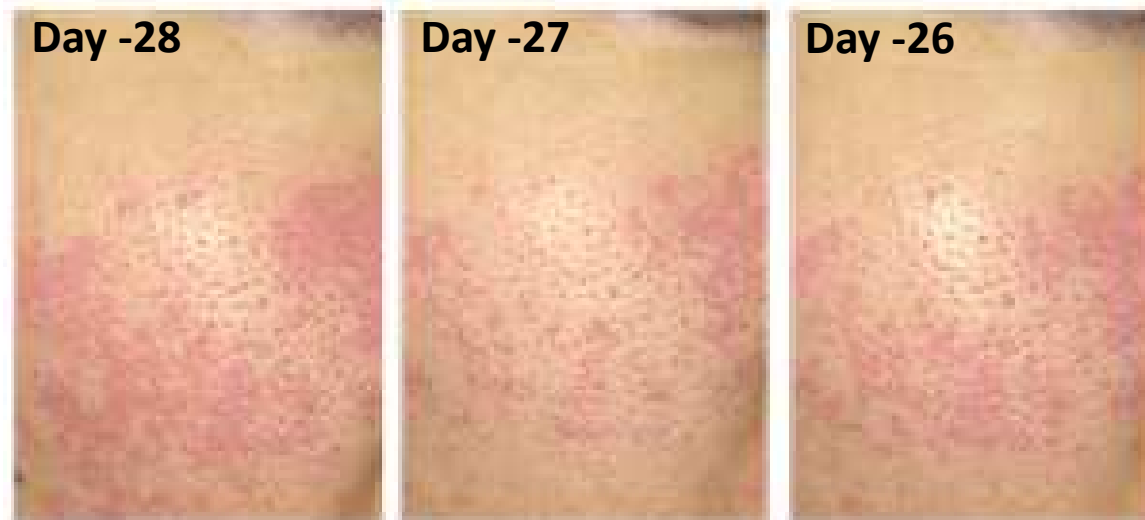

GFF treatment  
at week 4

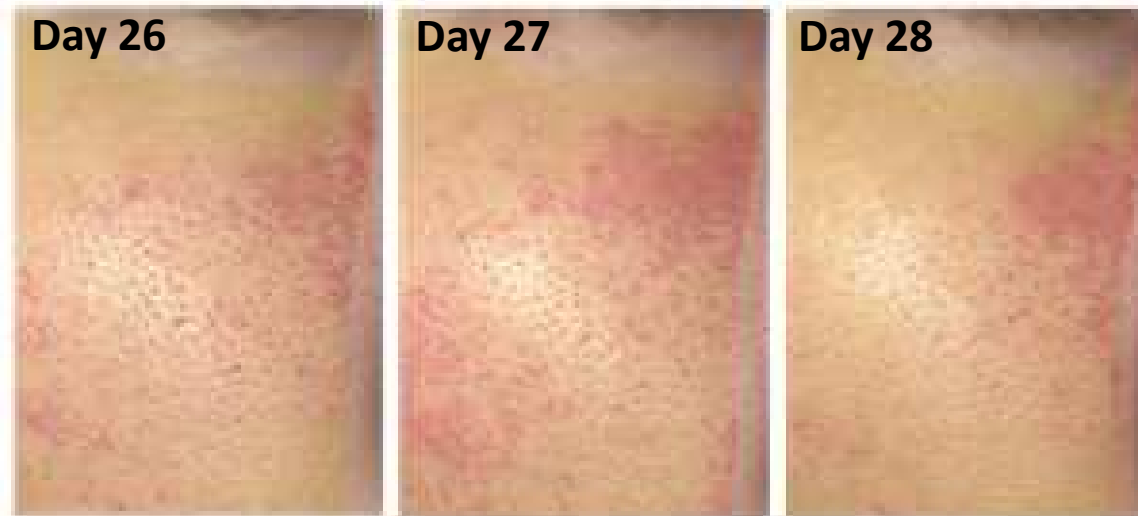

Clinical photos for redness.

Clinical pictures of redness in baseline period at week -4 and in GFF treatment at week 4 are shown.

## Supplementary Figure S3

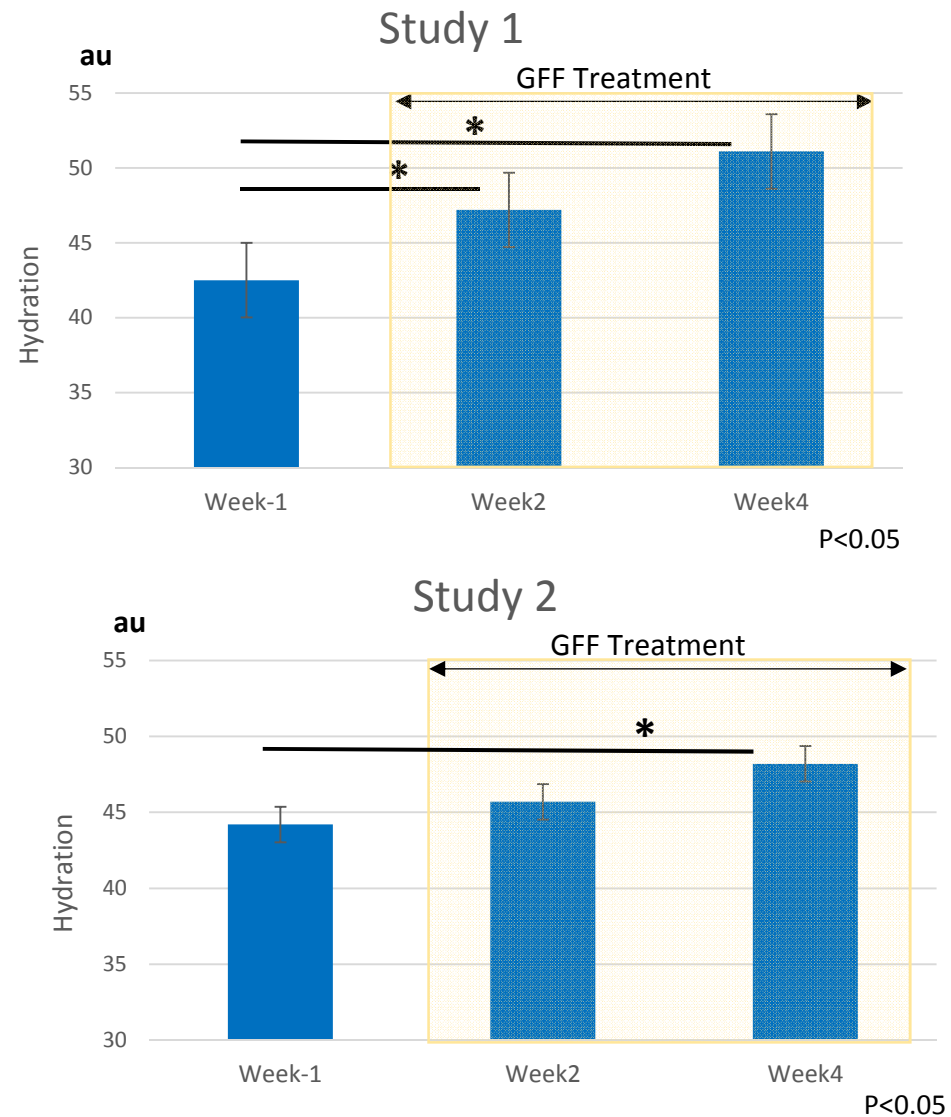

GFF improves facial skin hydration.  
Compared with baseline period at week -1, GFF treatment significantly upregulates facial skin hydration at week 2 and week 4 in study 1, and at week 4 in study 2, respectively.

Supplementary Figure S4

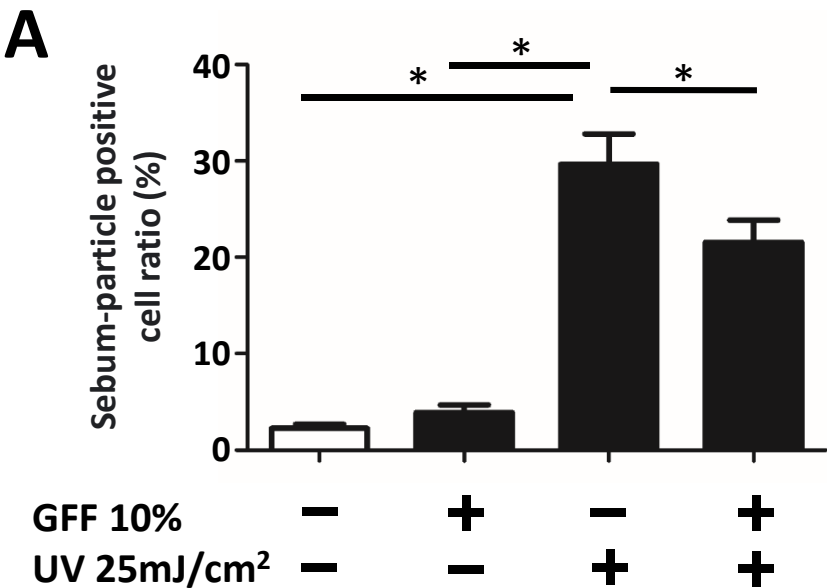

GFF inhibits UVB-induced sebum production by sebocytes.

SEB-1 cells (cultured sebocytes) were treated with or without ultraviolet ray B (UVB) irradiation (25mJ/cm<sup>2</sup>) in the presence or absence of *Galactomyces* ferment filtrate (GFF, 10%) obtained from P&G Godo Kabusikigaisha. After 24 hrs incubation, sebum production of sebocytes was visualized using an Adipocyte Fluorescence Staining Kit (Cosmo Bio Co., Ltd., Tokyo, Japan).

A: UVB irradiation significantly increased the sebum-particle positive cell ratio compared with non-irradiated control, which was significantly decreased in the combinatory treatment with UVB and GFF.

B: Representative photographs for sebum production. Sebum particles were visualized by fluorescence technique (white arrows).

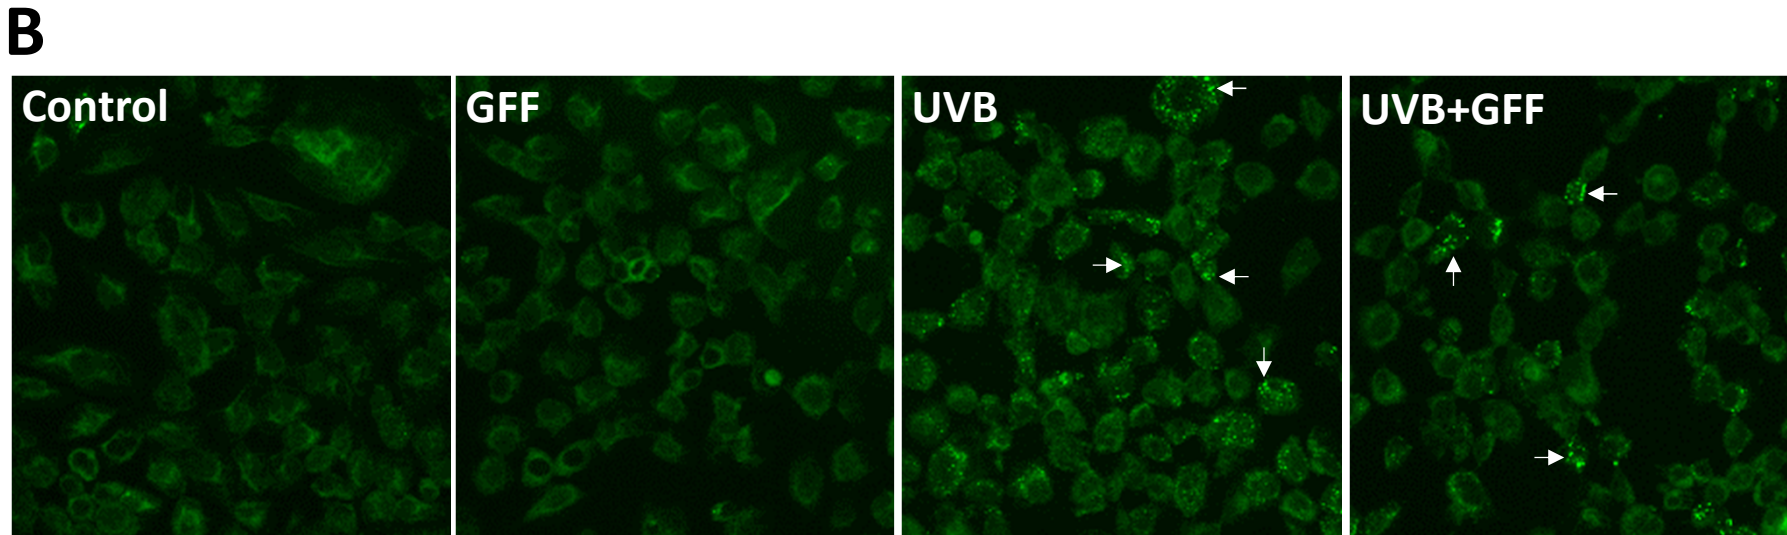

## Supplementary Table S1

### Net values of pore area, roughness and redness

| eMR Study 1             | Pore Area        | Roughness        | Redness          |
|-------------------------|------------------|------------------|------------------|
| Morning after wake-up   | 40.10<br>(3.829) | 70.20<br>(2.202) | 59.94<br>(4.626) |
| Morning after face wash | 34.00<br>(3.771) | 67.86<br>(2.213) | 60.96<br>(4.738) |
| Evening after face wash | 33.81<br>(3.605) | 68.57<br>(2.193) | 66.86<br>(4.927) |
|                         |                  |                  |                  |
| eMR Study 2             | Pore Area        | Roughness        | Redness          |
| Morning after wake-up   | 39.19<br>(3.978) | 69.55<br>(2.741) | 58.52<br>(4.513) |
| Morning after face wash | 33.72<br>(3.396) | 66.18<br>(2.478) | 60.28<br>(4.045) |
| Evening after face wash | 32.67<br>(3.510) | 67.01<br>(2.473) | 65.72<br>(4.051) |

Facial pore area, roughness and redness are evaluated by eMR Pro calculation software. In baseline period at week -4 to week -1, pore area and roughness were largest in the morning after wake-up. Redness was largest in the evening after face wash. Each value (a.u.) is expressed with mean and (standard deviation).
